# Supplementary material for: JAK2/IDH-mutant–driven myeloproliferative neoplasm is sensitive to combined targeted inhibition
Source: JCI journal article supplement (doi:10.1172/jci94516), 2018-01-21
Supplement: sd1 [file 1]

**Supplementary Materials:**

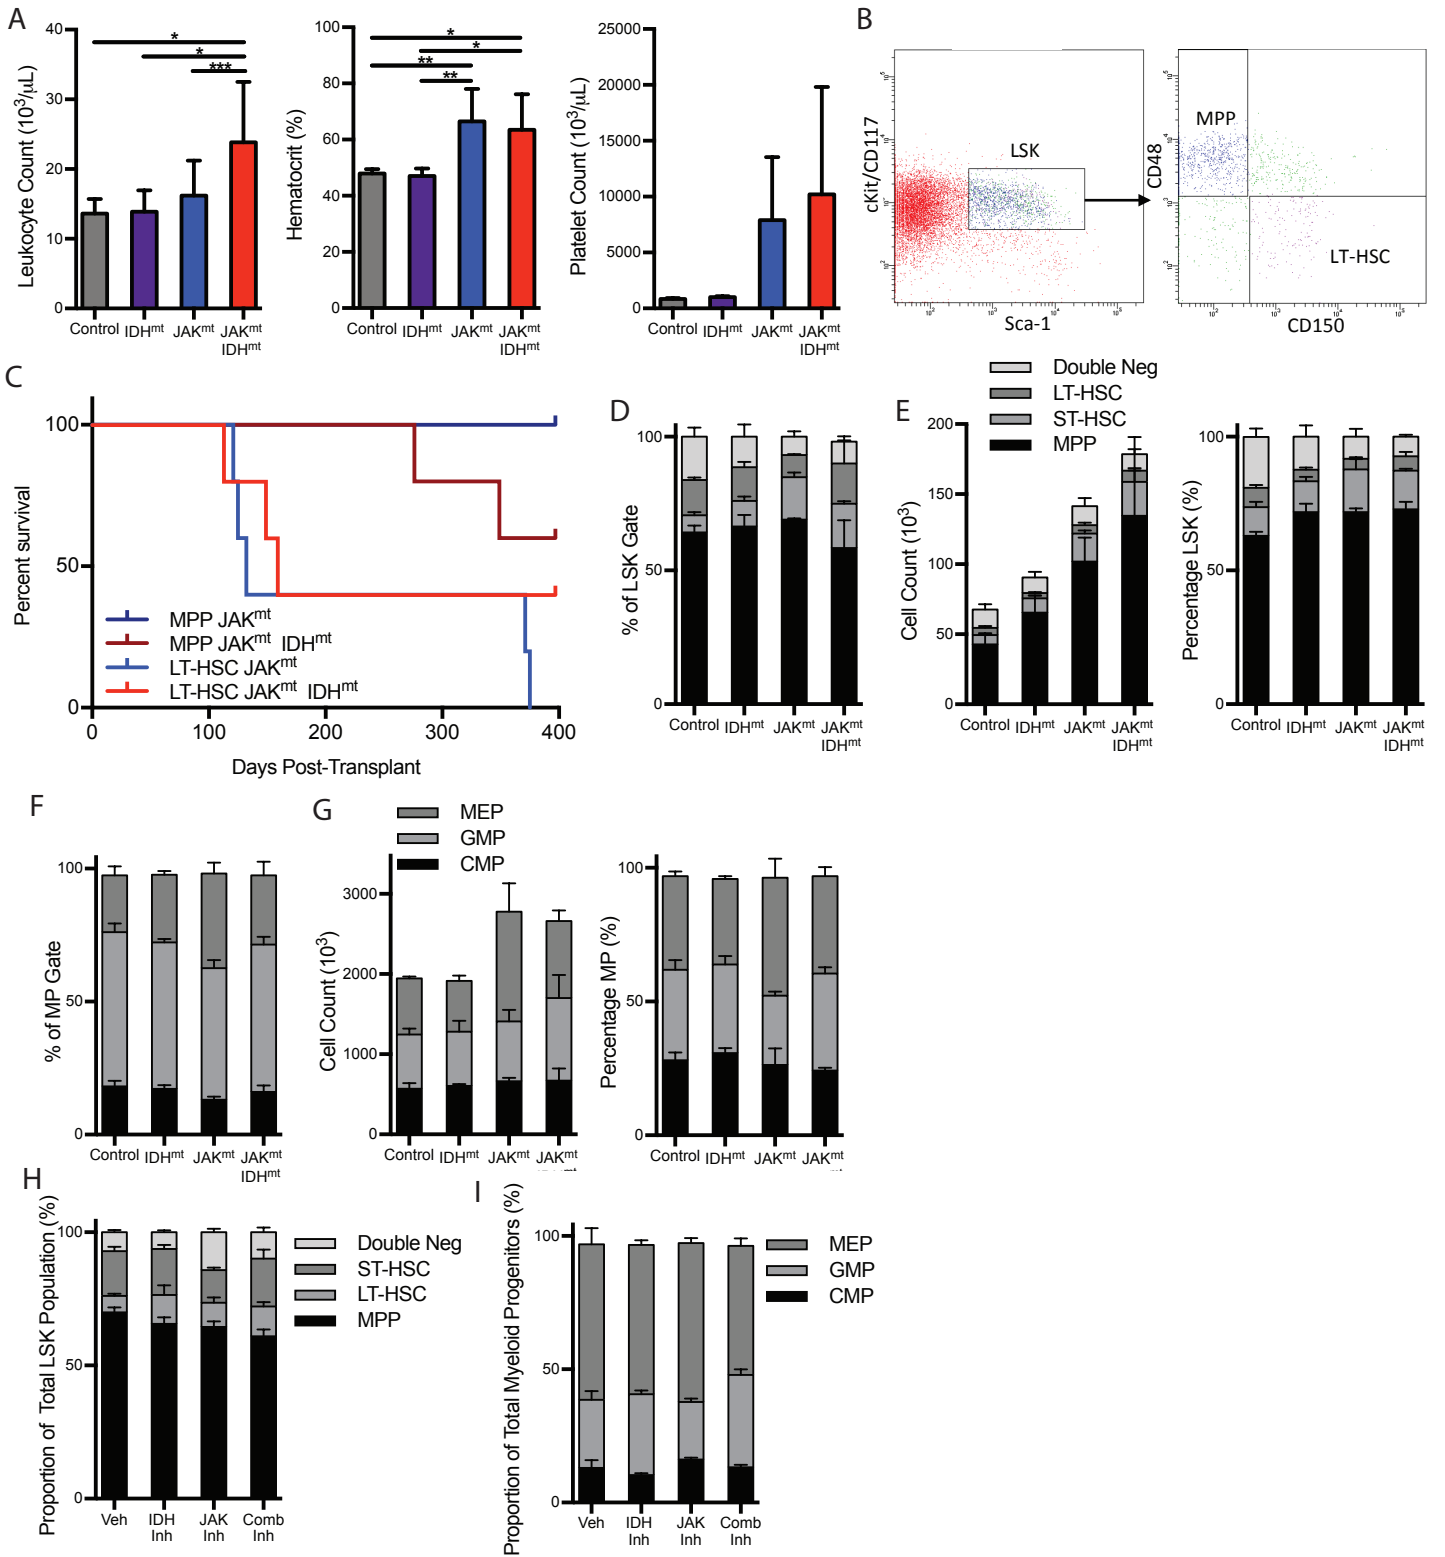

**Supplemental Figure 1: Combined mutant mouse phenotype** **A**, Peripheral blood leukocyte counts and hematocrit from recipients of competitive transplants 12 weeks post-transplant. **B**, Representative image of gates used to sort SK populations for injection into recipients. **C**, Survival curve of mice injected with different LSK populations **D**, LSK populations in primary *Idh2*<sup>R140Q</sup> *Jak2*<sup>V617F</sup> mice represented as proportions of total LSK. **E**, LSK populations in primary *IDH1*<sup>R140Q</sup> *Jak2*<sup>V617F</sup> mice represented as totals and proportions of total LSK. **F**, Myeloprogenitor populations in primary *Idh2*<sup>R140Q</sup> *Jak2*<sup>V617F</sup> mice represented as proportions of total LSK. **G**, Myeloprogenitor populations in primary *IDH1*<sup>R140Q</sup> *Jak2*<sup>V617F</sup> mice represented as totals and proportions of total LSK. **H**, LSK, and **I**, Myeloprogenitor compartments expressed as proportions of subcompartments in *Idh2*<sup>R140Q</sup> *Jak2*<sup>V617F</sup> bone marrow recipients treated with targeted inhibitors. \*P<0.05, \*\*P<0.01, \*\*\*P<0.001, \*\*\*\*P<0.0001.
